# Supplementary material for: CD4 and FOXP3 as predictive markers for the recurrence of T3/T4a stage II colorectal cancer: applying a novel discrete Bayes decision rule
Source: PubMed Central journal article supplement (PMC9578193; doi:10.1186/s12885-022-10181-7), 2022-10-18
Supplement: 12885_2022_10181_MOESM1_ESM.pdf [file 12885_2022_10181_MOESM1_ESM.pdf]

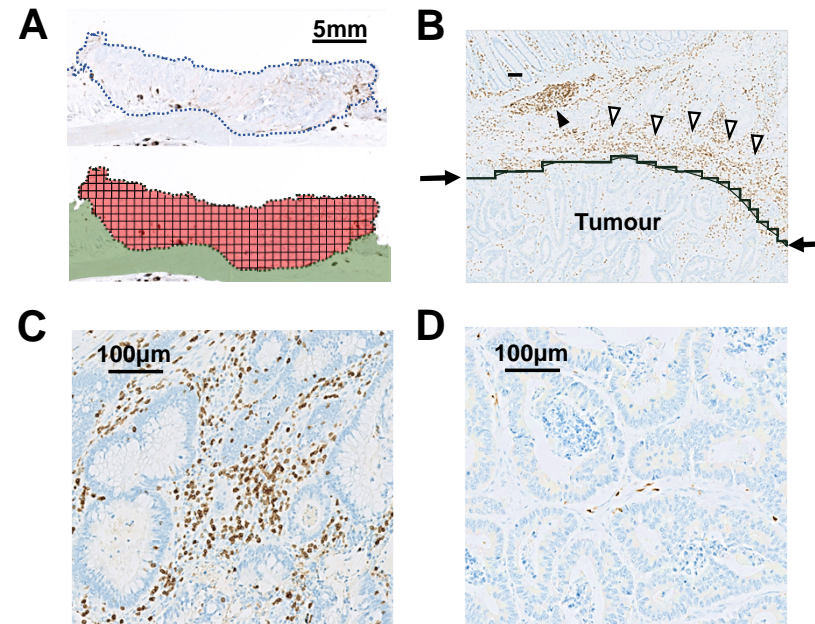

**Fig. S1. IHC of CD3<sup>+</sup> TILs in CRC**

**A)** Colon tissues were divided into 1-mm<sup>2</sup> tiles, with tumour tissue highlighted in red. **B)** Tumour regions were selected as the area under the curve (indicated by arrows), excluding peritumoural lymphocyte infiltration (open triangle) and extratumoural lymphoid structures (closed triangle). **C)** Representative IHC showing high CD3<sup>+</sup> cell density. **D)** Representative IHC showing low CD3<sup>+</sup> cell density.
