# Supplementary material for: CD4 and FOXP3 as predictive markers for the recurrence of T3/T4a stage II colorectal cancer: applying a novel discrete Bayes decision rule
Source: PubMed Central journal article supplement (PMC9578193; doi:10.1186/s12885-022-10181-7), 2022-10-18
Supplement: 12885_2022_10181_MOESM2_ESM.pdf [file 12885_2022_10181_MOESM2_ESM.pdf]

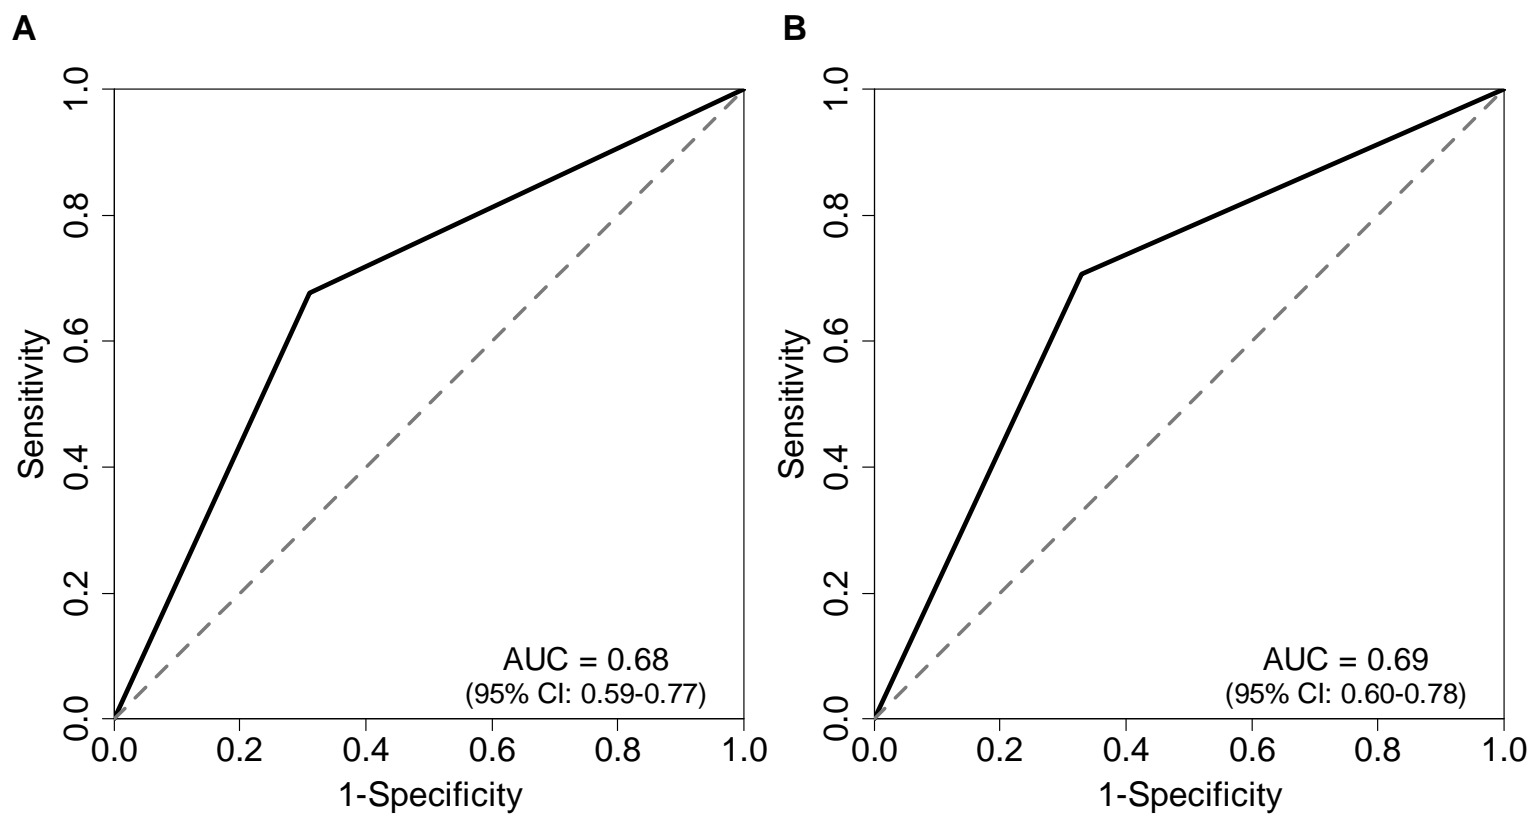

**Fig. S2. Receiver operating characteristic curves based on the optimal marker subsets of TILs**

**A)** The combination of two markers. **B)** The combination of three markers. AUC, area under the curve; CI, confidence interval.

### A: Left side (n=81)

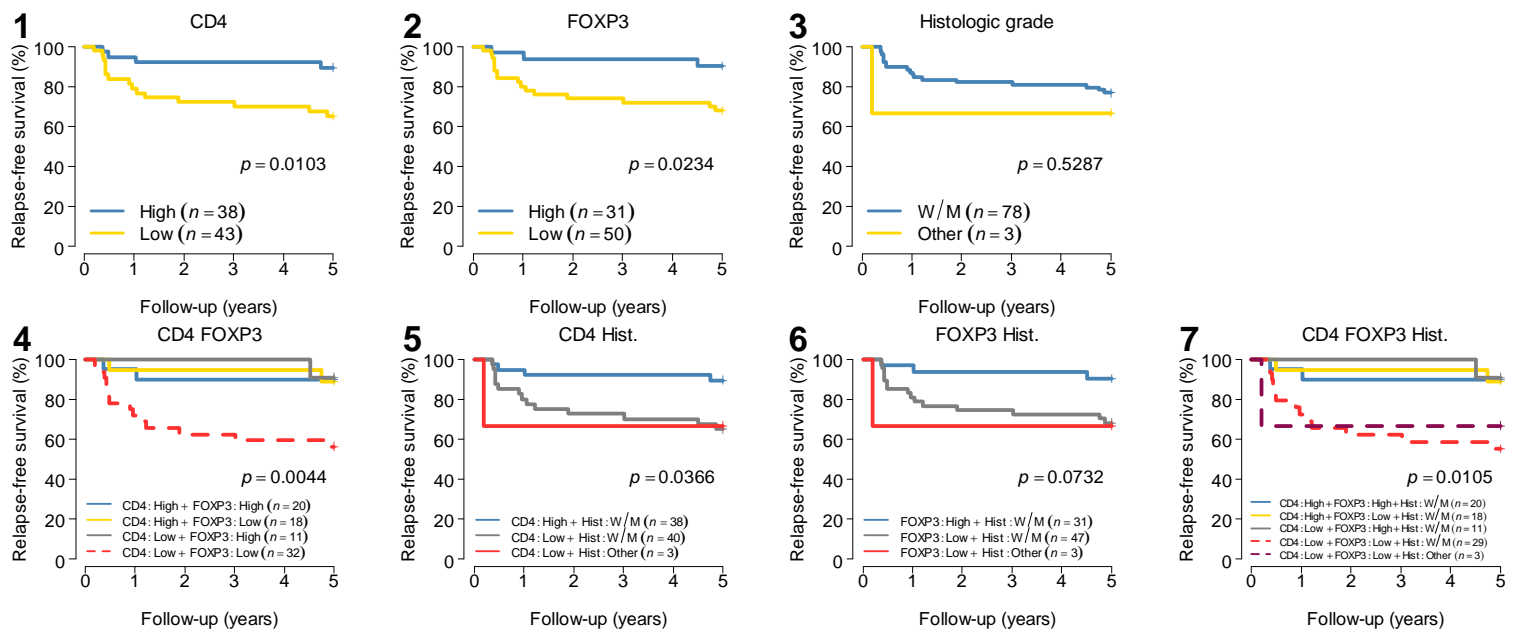

### B: Right side (n=56)

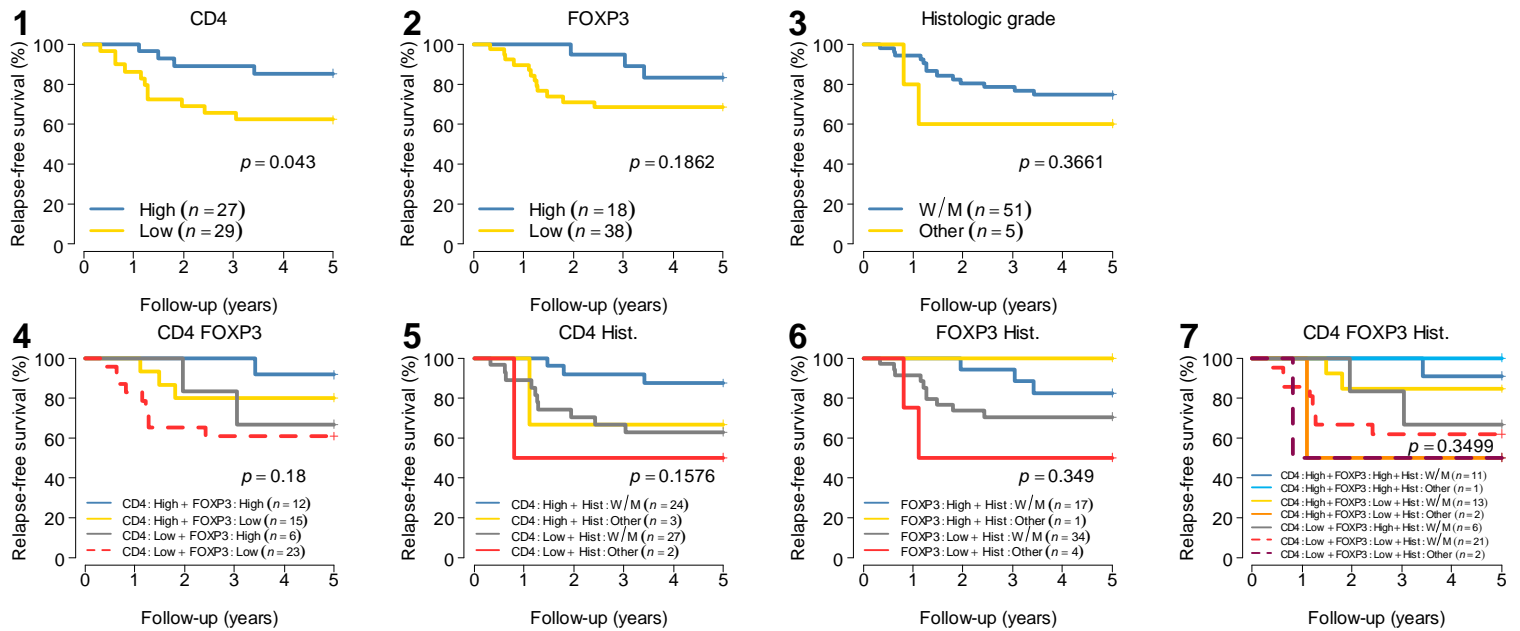

**Fig. S3. Survival analysis after surgery based on the optimal marker subsets of TILs**

**A)** RFS based on the tumours on the left side. **B)** RFS based on the tumours on the right side. W/M, well/moderately differentiated; Other, poorly differentiated/mucinous/undifferentiated; Hist., histologic grade; p-value, log-rank test.
