# Supplementary material for: CD4 and FOXP3 as predictive markers for the recurrence of T3/T4a stage II colorectal cancer: applying a novel discrete Bayes decision rule
Source: PubMed Central journal article supplement (PMC9578193; doi:10.1186/s12885-022-10181-7), 2022-10-18
Supplement: 12885_2022_10181_MOESM3_ESM.pdf [file 12885_2022_10181_MOESM3_ESM.pdf]

Table S1. The association of clinicopathological and immunological characteristics with adjuvant therapy status (Stage II, T factor: T3/T4a)

| Variables                                           | Adjuvant therapy: Yes (n=87)  |                              | Adjuvant therapy: No (n=50)   |                              |
|-----------------------------------------------------|-------------------------------|------------------------------|-------------------------------|------------------------------|
|                                                     | 5-year recurrence: Yes (n=24) | 5-year recurrence: No (n=63) | 5-year recurrence: Yes (n=10) | 5-year recurrence: No (n=40) |
| Age†                                                | 71.0 [64.5, 78.2]             | 67.0 [59.0, 75.0]            | 76.0 [62.5, 80.2]             | 75.5 [63.8, 80.2]            |
| Sex: male/female                                    | 11/13                         | 38/25                        | 7/3                           | 17/23                        |
| T factor: T3/T4a                                    | 18/6                          | 52/11                        | 10/0                          | 36/4                         |
| Histologic grade                                    |                               |                              |                               |                              |
| well                                                | 4                             | 15                           | 1                             | 5                            |
| moderately                                          | 19                            | 45                           | 7                             | 33                           |
| poorly                                              | 1                             | 1                            | 0                             | 1                            |
| mucinous                                            | 0                             | 2                            | 0                             | 0                            |
| undifferentiated                                    | 0                             | 0                            | 2                             | 1                            |
| Vascular/lymphatic invasion: present/absent         | 15/9                          | 29/34                        | 6/4                           | 20/20                        |
| Location: left side/right side                      | 13/11                         | 38/25                        | 6/4                           | 24/16                        |
| Perforation: present/absent                         | 0/24                          | 2/61                         | 10/0                          | 40/0                         |
| CD3 density: High/Low                               | 11/13                         | 29/34                        | 2/8                           | 18/22                        |
| CD4 density: High/Low                               | 6/18                          | 33/30                        | 2/8                           | 24/16                        |
| CD8 density: High/Low                               | 10/14                         | 35/28                        | 3/7                           | 19/21                        |
| FOXP3 density: High/Low                             | 6/18                          | 27/36                        | 0/10                          | 16/24                        |
| CD4 & FOXP3 densities: Low & Low/Other combinations | 15/9                          | 20/43                        | 8/2                           | 12/28                        |

†, median [interquartile range]; high values of CD3, CD8, CD4 and FOXP3 are  $\geq 339.1$ ,  $\geq 72.2$ ,  $\geq 64.6$  and  $\geq 89.1$  cells/mm<sup>2</sup>, respectively.

Table S2. Classification results (Stage: II, T factor: T3/T4a, Adjuvant therapy: No)

| Optimal combination of markers |       |                  |                |             |              |
|--------------------------------|-------|------------------|----------------|-------------|--------------|
| CD4                            | FOXP3 | —                | Decision       | Sensitivity | Specificity  |
| High                           | High  | —                | Non-recurrence | —           | 1 (12/12)    |
| High                           | Low   | —                | Non-recurrence | 0 (0/2)     | 1 (12/12)    |
| Low                            | High  | —                | Non-recurrence | —           | 1 (4/4)      |
| Low                            | Low   | —                | Recurrence     | 1 (8/8)     | 0 (0/12)     |
|                                |       |                  | Total          | 0.80 (8/10) | 0.70 (28/40) |
| CD4                            | FOXP3 | Histologic grade |                |             |              |
| High                           | High  | Well/Moderate    | Non-recurrence | —           | 1 (12/12)    |
| High                           | High  | Other            | —              | —           | —            |
| High                           | Low   | Well/Moderate    | Non-recurrence | 0 (0/1)     | 1 (11/11)    |
| High                           | Low   | Other            | Recurrence     | 1 (1/1)     | 0 (0/1)      |
| Low                            | High  | Well/Moderate    | Non-recurrence | —           | 1 (4/4)      |
| Low                            | High  | Other            | —              | —           | —            |
| Low                            | Low   | Well/Moderate    | Recurrence     | 1 (7/7)     | 0 (0/11)     |
| Low                            | Low   | Other            | Recurrence     | 1 (1/1)     | 0 (0/1)      |
|                                |       |                  | Total          | 0.90 (9/10) | 0.68 (27/40) |
